# Supplementary material for: Graphene oxide exhibits broad-spectrum antimicrobial activity against bacterial phytopathogens and fungal conidia by intertwining and membrane perturbation
Source: Royal Society of Chemistry journal article supplement (doi:10.1039/c3nr04941h), 2013-11-15
Supplement: c3nr04941h.pdf [file c3nr04941h.pdf]

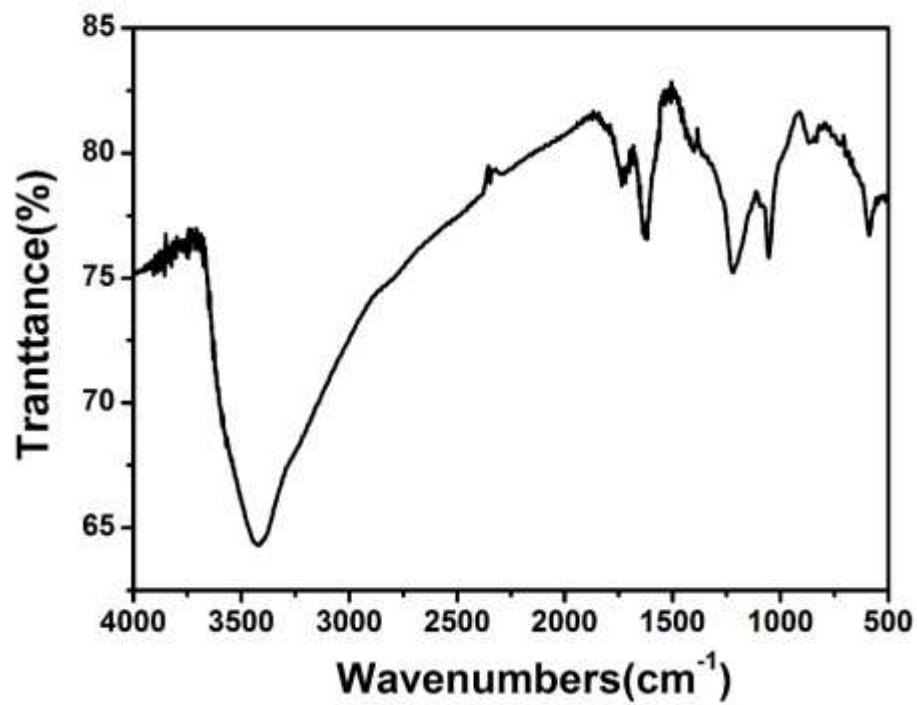

Fig. S1. Infrared spectra of GO.

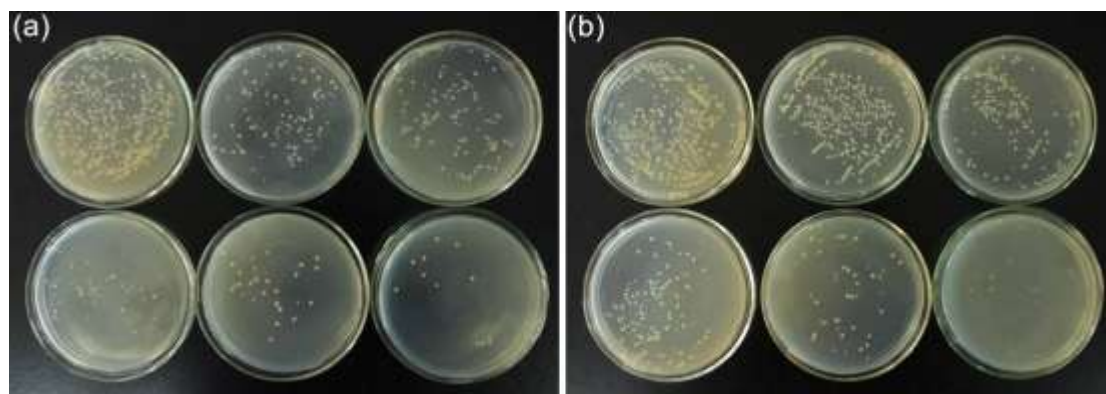

Fig. S2 LB-agar plate images of (a) *X. campestris pv. undulosa* and (b) *P. syringae* bacterial colony after treatment with different concentration of GO. The LB-agar plates in each image successively means 0  $\mu\text{g mL}^{-1}$ , 10  $\mu\text{g mL}^{-1}$ , 50  $\mu\text{g mL}^{-1}$ , 100  $\mu\text{g mL}^{-1}$ , 250  $\mu\text{g mL}^{-1}$ , 500  $\mu\text{g mL}^{-1}$ , respectively.

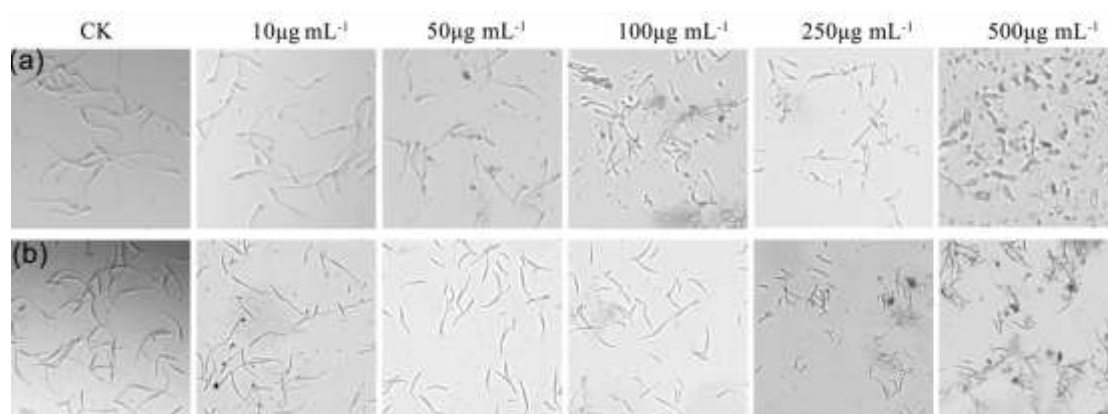

Fig. S3 Photomicrograph of GO-induced macroconidium germination of (a) *F. oxysporum* spores and (b) *F. graminearum* spores.

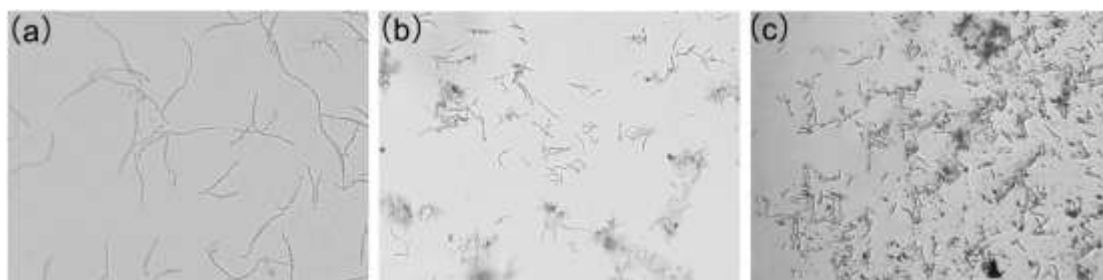

Fig. S4 Photomicrograph of GO-induced macroconidium germination of *F. graminearum* for 12h at (a)  $0 \mu\text{g mL}^{-1}$ , (b)  $500 \mu\text{g mL}^{-1}$  and (c)  $1000 \mu\text{g mL}^{-1}$ .
